# Supplementary material for: Opsin 1 and Opsin 2 of the Corn Smut Fungus Ustilago maydis Are Green Light-Driven Proton Pumps
Source: PubMed Central journal article supplement (PMC6467936; doi:10.3389/fmicb.2019.00735), 2019-04-10
Supplement: Data_Sheet_1.pdf [file Data_Sheet_1.pdf]

## Supplementary Material

**Supplementary Table 1. Primers used in this study.**

| Primer sequence 5' → 3'                                           | Description (Name)                                     |
|-------------------------------------------------------------------|--------------------------------------------------------|
| ATATAATATTGCCTCTCTCTAGGCAATCTACC                                  | UMAG_03180 (wco1) LF fwd                               |
| ATATGGCCATCTAGGCCCTTGAAGGGCAATCACTAATTGC                          | UMAG_03180 (wco1) LF rev                               |
| ATATGGCCTGAGTGGCCAGCGCTACCAAGCTCTCTCTCC                           | UMAG_03180 (wco1) RF fwd                               |
| ATATAATATTCTTATTACTTACTACCACAGTGC                                 | UMAG_03180 (wco1) RF rev                               |
| ATATAATATTGAGCACGCTTCCGGTCGACGCG                                  | UMAG_05732 (phy1) LF fwd                               |
| ATATGGCCATCTAGGCCGCGATCCGCCTAGACGTATAGC                           | UMAG_05732 (phy1) LF rev                               |
| ATATGGCCTGAGTGGCCTGTTGTCTGTGTTGAAGAATGG                           | UMAG_05732 (phy1) RF fwd                               |
| ATATAATATTGGTTCGAGCTTGGTTGCGATTCCG                                | UMAG_05732 (phy1) RF rev                               |
| GTAACGCGAGGGTTTCCAGTACGACGATTTAAATTTAGAGCAACCTCGTGGTGAAAGAGG      | UMAG_02629 (ops1) LF fwd                               |
| CAATTGTACGCCATGTTGGCCATCTAGGCCATCATTTCAGTCAACCAACGCGAGAAATTTTTTAC | UMAG_02629 (ops1) LF rev                               |
| GTGCGGCCGCATTAATAGGCCCTGAGTGGCCGTTGAGAAGCTTCACGGATCAAGGAGGTGACACG | UMAG_02629 (ops1) RF fwd                               |
| GCGGATAACAATTTACACAGGAAACAGCATTAAATCAGAGTGTGCGACGAGGCAGTAGAAC     | UMAG_02629 (ops1) RF rev                               |
| GTAACGCCAGGGTTTCCAGTACGACGAAATATCTCGTCTTGCTCGTTGTTAATAAAC         | UMAG_00371 (ops2) LF fwd                               |
| CAATTGTCACGCCATGGTGGCCATCTAGGCCGTTGAGTCAGAGCAGGCAAAGCGGAAGC       | UMAG_00371 (ops2) LF rev                               |
| GTGCGGCCGCATTAATAGGCCCTGAGTGGCCACCACTCGATTACCGCTTGCACTCGCCCTTG    | UMAG_00371 (ops2) RF fwd                               |
| GCGGATAACAATTTACACAGGAAACAGCAATATTATCGATCTGGAAGCCAAGTTTGCGCCG     | UMAG_00371 (ops2) RF rev                               |
| ATGGTACCATGAACGTCGTATCCGAGCTGC                                    | UMAG_02629 fwd for p1747                               |
| ATGGATCCCTGGGTAACGGTGTGCATTTGG                                    | UMAG_02629 rev for p1747                               |
| ATGGATCCATGAACGTCGTCTACTACGACAGCGTC                               | UMAG_00371 fwd for p1742                               |
| TAATCCCGGGGGCGTCTTCAGCGCGGGTTC                                    | UMAG_00371 rev for p1742                               |
| GAACTTCAAGCTCTCGCAC                                               | UMAG_03726 (cpr1) qRT-PCR fwd                          |
| TCTCGATAGCCTTGACGATG                                              | UMAG_03726 (cpr1) qRT-PCR rev                          |
| ACTCTTCGCTCGTTCTCACC                                              | UMAG_02629 (ops1) qRT-PCR fwd                          |
| CCTCGTAGTCTGAAAACCTTGCC                                           | UMAG_02629 (ops1) qRT-PCR rev                          |
| TTTGCTCGATACATTGACTGG                                             | UMAG_00371 (ops2) qRT-PCR fwd                          |
| GGATGAACACCAGCAATCAC                                              | UMAG_00371 (ops2) qRT-PCR rev                          |
| ACTAAGCTTATGAACGTCGTATCCGAGCTGCTG                                 | ops1 fwd for pcDNA <sup>TM5</sup> /FRT/TO <sup>©</sup> |
| TGGCGGCCGCTGGGTAACGGTGTGCATAAG                                    | ops1 rev for pcDNA <sup>TM5</sup> /FRT/TO <sup>©</sup> |
| ACTAAGCTTATGAACGTCGTCTACTACGACAGC                                 | ops2 fwd for pcDNA <sup>TM5</sup> /FRT/TO <sup>©</sup> |
| TGGCGGCCGCGCGTCTTCAGCGCGGGTTC                                     | ops2 rev for pcDNA <sup>TM5</sup> /FRT/TO <sup>©</sup> |
| ACTAAGCTTATGTTACAAACATCTTGCTCAAACGC                               | ops3 fwd for pcDNA <sup>TM5</sup> /FRT/TO <sup>©</sup> |
| TGGCGGCCGCGGTAACAAGAGTGTGTGGAACG                                  | ops3 rev for pcDNA <sup>TM5</sup> /FRT/TO <sup>©</sup> |
| CCATCTTTTTCGATTGGGTCATGATCATCACC                                  | 187t_SDM_Primer_L149W_Um Ops1 fwd                      |
| GGTGATGATCATGACCCAATCGAAAAAGATGG                                  | 188t_SDM_Primer_L149W_Um Ops1 rev                      |
| CCTGCTCCTCGACATCCTGCTTG                                           | 205t_UmOps1_E129D_fwd                                  |
| CAAGCAGGATGTCGAGGAGCAGG                                           | 206t_UmOps1_E129D_rev                                  |
| GGTCTCGCCGAGGGTAGCAACACAATTTCCG                                   | 207t_UmOps1_D225E_fwd                                  |
| CGAAATTGTGTTGCTACCTCGCGAGACC                                      | 208t_UmOps1_D225E_rev                                  |

**Supplementary Table 2. Overview of various *U. maydis* strains expressing eGFP-tagged UmOps1 or UmOps2.**

| UmOps1 (UMAG_02629)                               |                                                                                                                                      |            |                                                                                                                                                   |
|---------------------------------------------------|--------------------------------------------------------------------------------------------------------------------------------------|------------|---------------------------------------------------------------------------------------------------------------------------------------------------|
| Name                                              | Description                                                                                                                          | Resistance | Microscopic evaluation                                                                                                                            |
| FB1 $\Delta$ UmOps1 <i>pcrg</i> -UmOps1::eGFP #1  | genomic deletion of UMAG_02629 + single genomic insertion of <i>pcrg</i> -UMAG_02629::eGFP into <i>ip</i> -locus (pCRG-GFP-MXN)      | Hyg, Cbx   | See Figure 5.                                                                                                                                     |
| FB1 <i>pcrg</i> -UmOps1::eGFP #A                  | multiple genomic insertions of <i>pcrg</i> -UMAG_02629::eGFP into <i>ip</i> -locus (pCRG-GFP-MXN)                                    | Cbx        | Localization in plasma membrane; in addition accumulation in the endoplasmic reticulum while the promoter is active.                              |
| UmOps2 (UMAG_00371)                               |                                                                                                                                      |            |                                                                                                                                                   |
| FB1 $\Delta$ Umops2 <i>petef</i> -UmOps2::eGFP #1 | genomic deletion of UMAG_00371 + multiple genomic insertions of <i>petef</i> -UMAG_00371::eGFP into <i>ip</i> -locus (pETEF-GFP-MXN) | Hyg, Cbx   | Localization in vacuolar membrane; in addition accumulation in the endoplasmic reticulum.                                                         |
| FB1 $\Delta$ UmOps2 <i>petef</i> -UmOps2::eGFP #9 | genomic deletion of UMAG_00371 + single genomic insertion of <i>petef</i> -UMAG_00371::eGFP into <i>ip</i> -locus (pETEF-GFP-MXN)    | Hyg, Cbx   | See Figure 5.                                                                                                                                     |
| FB1 <i>pcrg</i> -UmOps2::eGFP #1                  | multiple genomic insertions of <i>pcrg</i> -UMAG_00371::eGFP into <i>ip</i> -locus (pCRG-GFP-MXN)                                    | Cbx        | Localization in vacuolar membrane; in addition accumulation in the endoplasmic reticulum.                                                         |
| FB1 <i>pcrg</i> -UmOps2::eGFP #7                  | multiple genomic insertions of <i>pcrg</i> -UMAG_00371::eGFP into <i>ip</i> -locus (pCRG-GFP-MXN)                                    | Cbx        | See supplementary Figure 8. Localization in vacuolar membrane; in addition accumulation in the endoplasmic reticulum when the promoter is active. |
| FB1 $\Delta$ UmOps2 <i>pcrg</i> -UmOps2::eGFP #B  | genomic deletion of UMAG_00371 + multiple genomic insertions of <i>pcrg</i> -UMAG_00371::eGFP into <i>ip</i> -locus (pCRG-GFP-MXN)   | Hyg, Cbx   | Localization in vacuolar membrane; in addition accumulation in the endoplasmic reticulum also several hours after inactivation of the promoter.   |



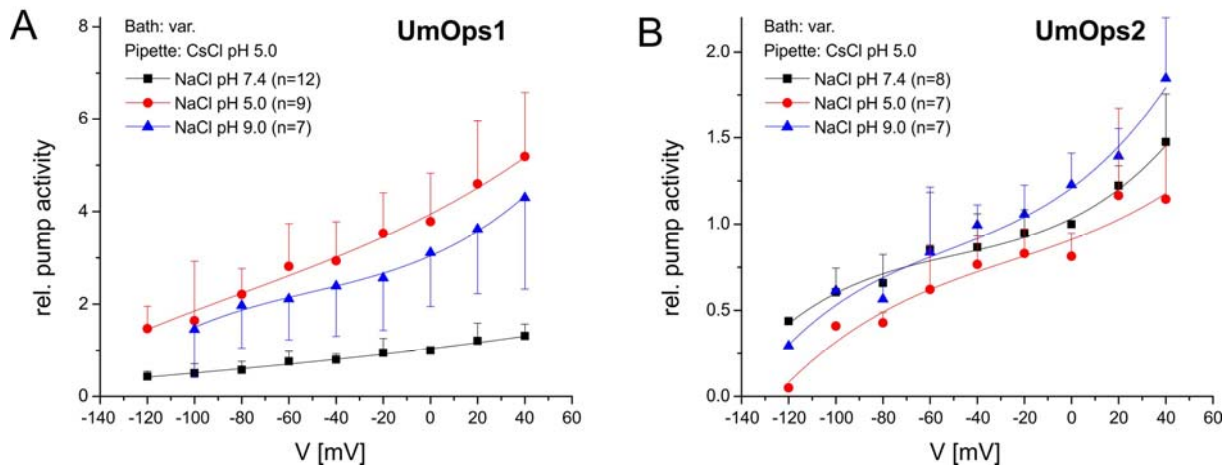

**Supplementary Figure 2. Pump activity of UmOps1 (A) and UmOps2 (B) in absence of intracellular sodium.** I-V-plots of the pump current in CsCl-based pipette solution at different membrane potentials and extracellular pH values as indicated. Measurements in TEA-Cl were similar but did not yield satisfying signal-to-noise ratios. In both conditions, the pump characteristics of both rhodopsins were hardly influenced by the absence or presence of sodium ions. For comparison see Figure 3B and 3C.

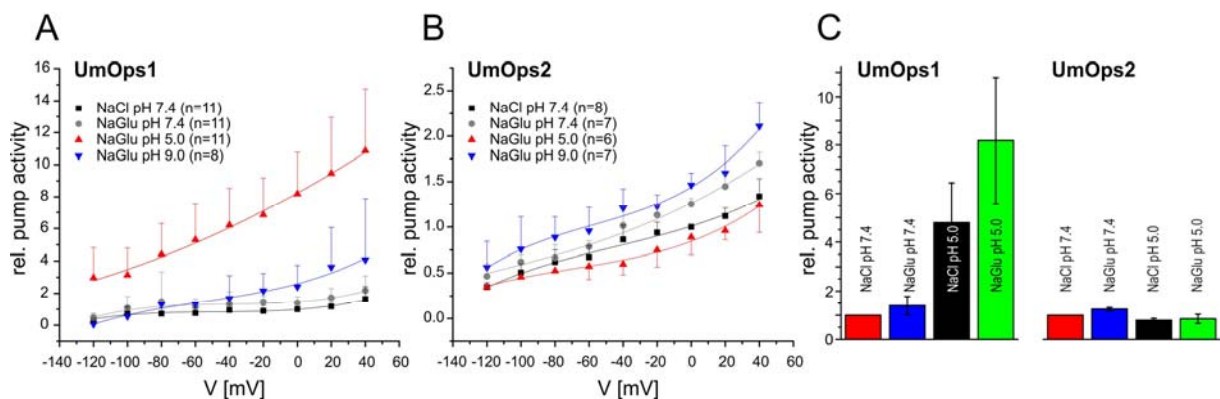

**Supplementary Figure 3. Pump activity of UmOps1 (A) and UmOps2 (B) in absence of extracellular chloride.** I-V-plots of the pump current in NaCl pH 7.4 and sodium gluconate-based bath solutions at different membrane potentials and extracellular pH values as indicated. In general, the pump characteristics of UmOps1 and UmOps2 were similar in gluconate- as in chloride-based (Fig. 3 B, C) solutions but slightly enhanced. C. Relative pump activity at 0 mV at different extracellular conditions. The presence of sodium gluconate in general leads to a slight enhancement of the pump activity when compared with NaCl. The supporting effect is very pronounced in UmOps1 at pH 5.0.

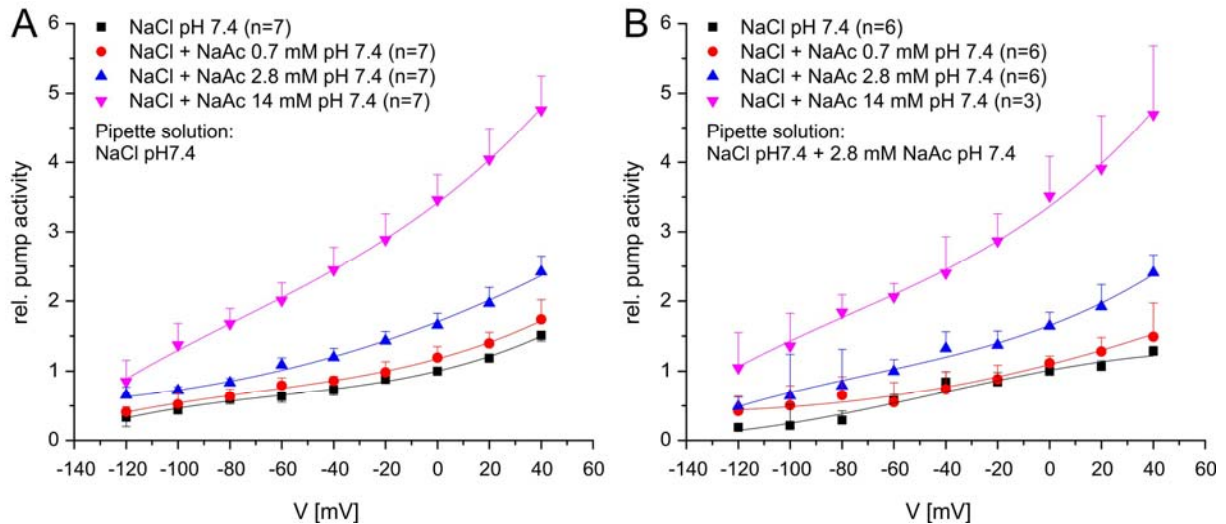

**Supplementary Figure 4. Supporting effect of sodium acetate on UmOps1 pump activity at different concentrations and intra- and extracellular pH 7.4.** The pipette solution was either untreated (A) or supplemented with 2.8 mM sodium acetate (B). Though the pump activity of UmOps1 is much lower in neutral environment than in pH 5.0 (see Fig. 4C), the supporting effect of sodium acetate is still present. The behavior is essentially the same when sodium acetate is absent or present in the pipette solution, suggesting that the interaction of WOAs and UmOps1 occurs in the extracellular part of the protein.

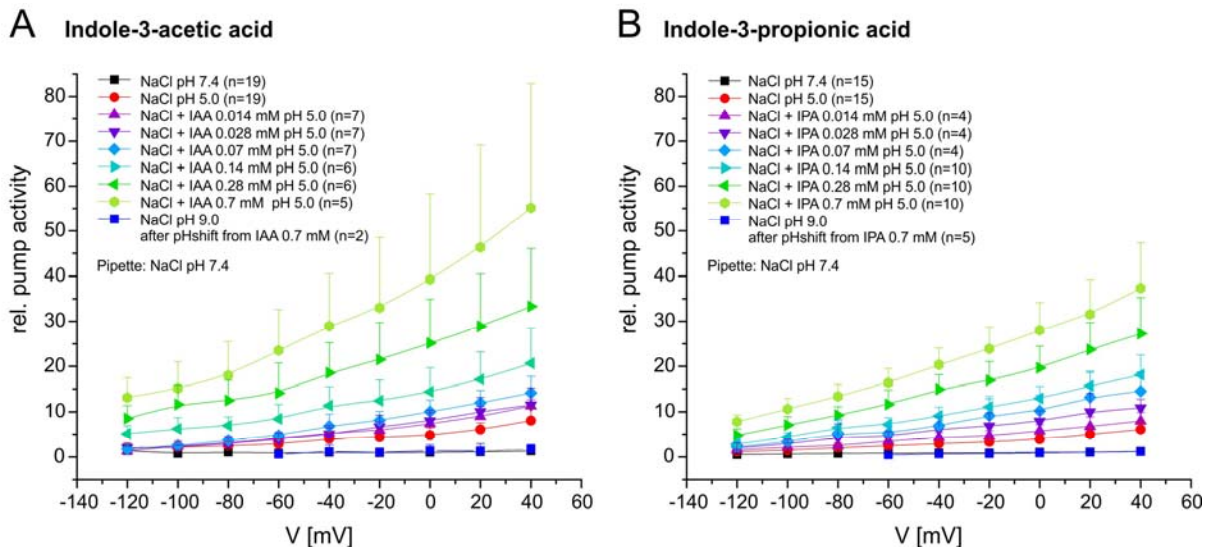

**Supplementary Figure 5. Increase of pump activity of UmOps1 in presence of Indole-3-acetic acid (IAA, A) and Indole-3-propionic acid (IPA, B).** I-V-plots of the pump currents in extracellular NaCl pH 7.4 and NaCl pH 5.0 with different concentrations of IAA / IPA at different membrane potentials as indicated.

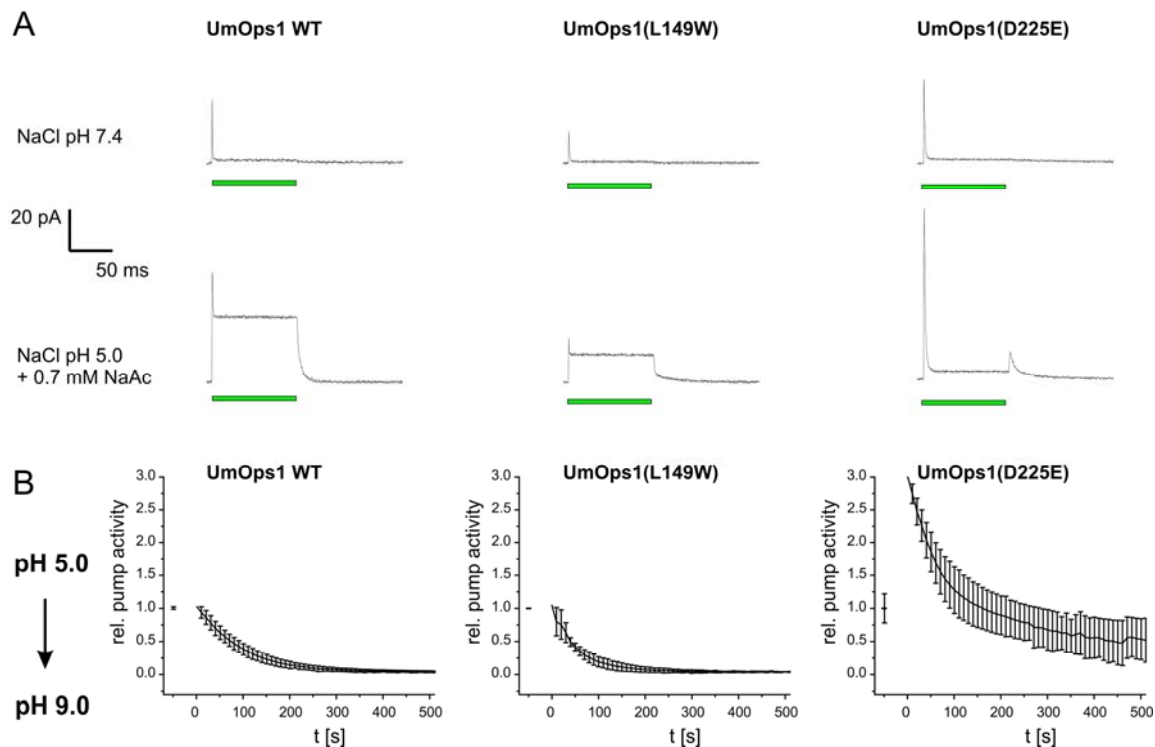

**Supplementary Figure 6. Whole cell patch-clamp analysis of UmOps1 mutants L149W and D225E in comparison with WT.** **A.** Typical traces showing the light-induced charge transfer by UmOps1 as indicated by the green bars. The pump intensity of UmOps1 WT and L149W strongly increased in the presence of WOAs at external pH 5.0 (lower row) compared to NaCl pH 7.4 (upper row), this behavior is less pronounced in D225E, which also exhibits a transient increase in pump activity after illumination indicating an electrogenic dark reaction. **B.** Relaxation of the UmOps1 pump activity after replacement of NaCl pH 5.0 + 7 mM sodium acetate by NaCl pH 9.0. Every 10 seconds the pump current was recorded. Using an exponential decay function, time constants of 89.2 s (WT), 56.5 s (L149W), and 89.7 s (D225E) were obtained. The D225E mutant exhibits a transient increased pump activity in pH 9.0, similar as described for CarO from *F. fujikuroi* (Adam et al., 2018).

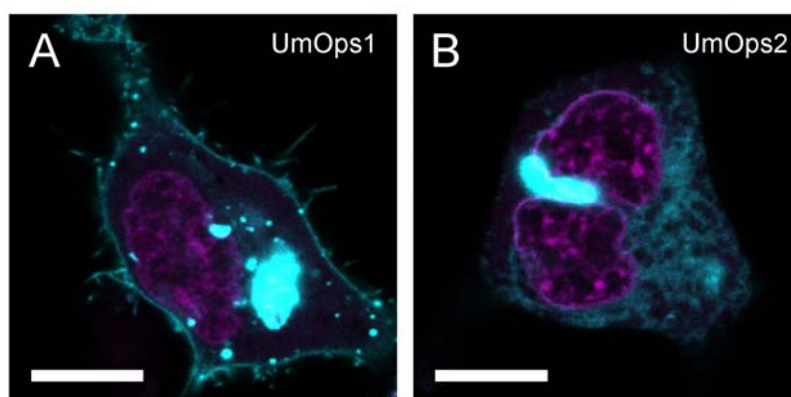

**Supplementary Figure 7: Heterologous expression of eYFP-tagged UmOps1 (A) and UmOps2 (B) in HEK293 cells.** Confocal laser scanning micrographs show the location of the respective rhodopsin (cyan) and the nucleus stained with SYTO® 59 (magenta). In accordance with our observations in sporidia (Fig. 5, main part), we found distinct eYFP mediated fluorescence in the plasma membrane of HEK293 UmOps1::eYFP but mainly in endomembranes in HEK293 UmOps2::eYFP cells. The low amount of UmOps2 in the plasma membrane is in accordance with small pump currents of this rhodopsin. Scale bars represent 10  $\mu\text{m}$ .

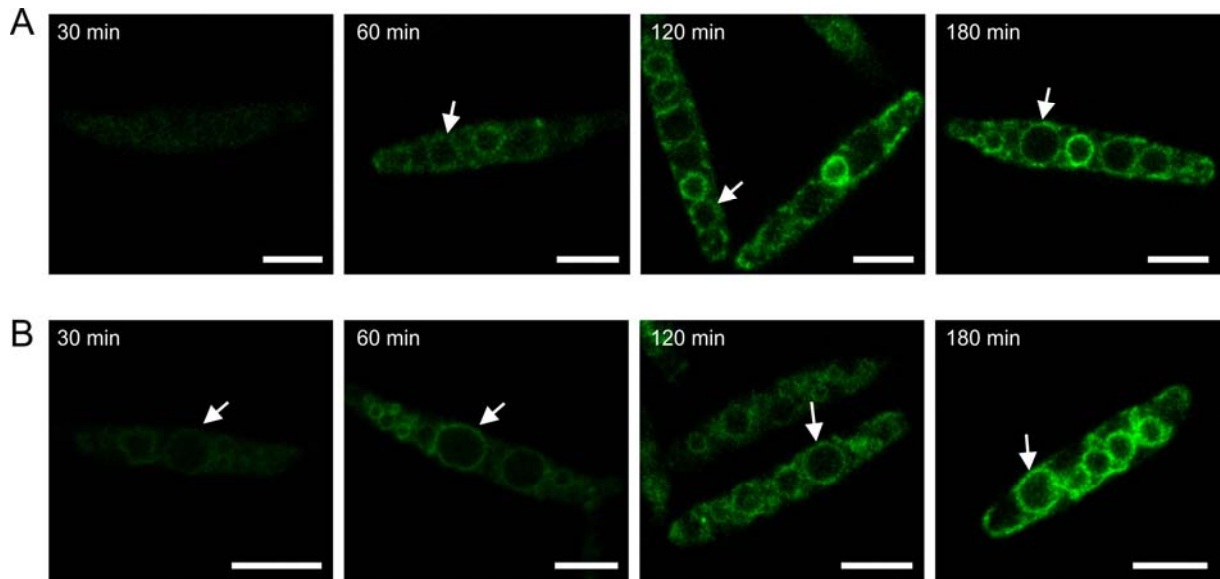

**Supplementary Figure 8: CLSM analysis of the localization of UmOps2::eGFP in *U. maydis* sporidia in dependence of the expression time.** The strain FB1 *pcrg-UmOps2::eGFP* with an arabinose-inducible promoter was used for this analysis. Protein localization after promoter on-times between 30 min and 180 min were analyzed as indicated (time of exposure to arabinose). The samples were fixed with 1% formaldehyde either 25 min (A) or 195 min (B) after the removal of arabinose allowing to trace the protein expression after stop of transcription. Note that the UmOps2::eGFP protein was never observed in the plasma membrane but only found in vacuolar membranes or after longer expression times also in the ER. All images were obtained using the same parameters for illumination and recording (4% laser power (488 nm), photomultiplier: 700). White bars represent 5  $\mu$ m. Arrows highlight fluorescence in the vacuolar membranes.
